# Supplementary material for: Enhancing the Photocatalytic Activity of Halide Perovskite Cesium Bismuth Bromide/Hydrogen Titanate Heterostructures for Benzyl Alcohol Oxidation
Source: MDPI journal article supplement (doi:10.3390/nano14090752), 2024-04-25
Supplement: s1 [file s1]

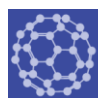

# Enhancing the Photocatalytic Activity of Halide Perovskite Cesium Bismuth Bromide/Hydrogen Titanate Heterostructures for Benzyl Alcohol Oxidation

Huzaikha Awang <sup>1,2</sup>, Abdo Hezam <sup>3</sup>, Tim Peppel <sup>1,\*</sup> and Jennifer Strunk <sup>1,3,\*</sup>

<sup>1</sup> Leibniz Institute for Catalysis, Albert-Einstein-Str. 29a, 18059 Rostock, Germany; huzaikha.awang@catalysis.de

<sup>2</sup> Preparatory Centre for Science and Technology, Universiti Malaysia Sabah, Jalan UMS, Kota Kinabalu 88400, Sabah, Malaysia

<sup>3</sup> School of Natural Sciences, Technical University of Munich (TUM), Lichtenbergstr. 4, 85748 Garching, Germany; abdo.mohsen@tum.de

\* Correspondence: tim.peppel@catalysis.de (T.P.); jennifer.strunk@tum.de (J.S.)

**Table S1.** Comparison of photocatalysts for oxidation of BnOH to BzH and BzA.

| Materials                                                         | Condition              | Conversion (%) | Selectivity (%) / Conversion Rate of BzH        | Selectivity (%) / Conversion Rate of BzA      | Reference |
|-------------------------------------------------------------------|------------------------|----------------|-------------------------------------------------|-----------------------------------------------|-----------|
| CBHTNS-30                                                         | 2 h<br>O <sub>2</sub>  | 98             | 21 / 1.2 mmol g <sup>-1</sup> h <sup>-1</sup>   | 75 / 3.7 mmol g <sup>-1</sup> h <sup>-1</sup> | This Work |
|                                                                   | Blue Light             |                |                                                 |                                               |           |
|                                                                   | 20 mM<br>10 mg<br>2 ml |                |                                                 |                                               |           |
| Cs <sub>3</sub> Bi <sub>2</sub> Br <sub>9</sub> /TiO <sub>2</sub> | 4 h<br>Air             | 58.6           | > 99 / 1.5 mmol g <sup>-1</sup> h <sup>-1</sup> | -                                             | [1]       |
|                                                                   | 0.1 mM                 |                |                                                 |                                               |           |
|                                                                   | 10 mg<br>3 ml          |                |                                                 |                                               |           |
| CsPbBr <sub>3</sub> /TiO <sub>2</sub>                             | 20 h<br>O <sub>2</sub> | 40             | 99/-                                            | -                                             | [2]       |
|                                                                   | Vis. Light             |                |                                                 |                                               |           |
|                                                                   | 0.1 M<br>25 mg<br>5 ml |                |                                                 |                                               |           |
| Cs <sub>2</sub> TeBr <sub>6</sub>                                 | 2 h<br>UV              | -              | - / 16.7 µmol                                   | - / 1.5 µmol                                  | [3]       |
| Cs <sub>3</sub> Bi <sub>2</sub> Br <sub>9</sub>                   | 2 h<br>LED             | -              | - / < 6.0 µmol                                  | -                                             |           |
|                                                                   | 5 h<br>O <sub>2</sub>  |                | 98 / -                                          | -                                             |           |
| TiO <sub>2</sub> /Ti <sub>3</sub> C <sub>2</sub>                  | Vis. Light             | 97             |                                                 |                                               |           |
|                                                                   | 20 µmol                |                |                                                 |                                               |           |
|                                                                   | 30 mg<br>25 ml         |                |                                                 |                                               |           |
| Au-Pd/ H <sub>2</sub> Ti <sub>3</sub> O <sub>7</sub>              | 6 h<br>O <sub>2</sub>  | 91             | 72.6 / 139 mol/kg.h                             | 18.5 / -                                      | [5]       |

|                                                   |                       |      |            |   |     |
|---------------------------------------------------|-----------------------|------|------------|---|-----|
|                                                   | halogen light         |      |            |   |     |
|                                                   | 0.1 g                 |      |            |   |     |
|                                                   | 10 ml                 |      |            |   |     |
|                                                   | 8 h                   |      | > 98 / -   | - | [6] |
|                                                   | O <sub>2</sub>        |      |            |   |     |
| Au <sub>1</sub> Pt <sub>1</sub> /TiO <sub>2</sub> | Vis. Light            | 65.3 |            |   |     |
|                                                   | 0.05 M                |      |            |   |     |
|                                                   | 50 mg                 |      |            |   |     |
|                                                   | 20 ml                 |      |            |   |     |
| 0.5 wt% Au-0.5 wt% Pd/TiO <sub>2</sub>            | 4 h                   | 19   | > 80.5 / - | - | [7] |
|                                                   | TBHP as oxidant agent |      |            |   |     |

**Table S2.** Some of the recent literature on photodegradation performance of halide perovskite and hydrogen titanate.

| Materials                                                                                             | Pollutant                                 | Condition                 | Efficiency (%) | Reference |
|-------------------------------------------------------------------------------------------------------|-------------------------------------------|---------------------------|----------------|-----------|
| Cs <sub>3</sub> Bi <sub>2</sub> I <sub>9</sub> perovskite                                             | Organic dyes (RhB)                        | 3 h, visible light        | 93             | [8]       |
| Cs <sub>3</sub> Bi <sub>2</sub> Br <sub>9</sub> perovskite                                            | Organic dyes (MB)                         | 1.5 h, Visible light      | 80             | [9]       |
| Cs <sub>3</sub> Bi <sub>2</sub> Br <sub>9</sub> /TiO <sub>2</sub> heterojunction                      | 2-mercaptobenzothiazole (MBT)             | 20 min, visible light     | 99.9           | [1]       |
| C <sub>3</sub> N <sub>4</sub> /Cs <sub>3</sub> Bi <sub>2</sub> Br <sub>9</sub> composite              | Organic dyes (RhB)                        | 1 h, solar simulator      | 98             | [10]      |
| 2D tri-titanate (H <sub>2</sub> Ti <sub>3</sub> O <sub>7</sub> ) nanosheet                            | Organic dyes (MB and RhB)                 | 10 h, UV light            | 99.9 and 92.7  | [11]      |
|                                                                                                       |                                           |                           | Tar            | [12]      |
|                                                                                                       |                                           |                           | TNS : 52%      |           |
|                                                                                                       |                                           |                           | TNT : 70%      |           |
| 2D tri-titanate (H <sub>2</sub> Ti <sub>3</sub> O <sub>7</sub> ) nanosheets (TNS) and nanotubes (TNT) | Tar and Nicotine of Cigarette smoke (CS). | 24 h using machine-smoked | Nicotine       |           |
|                                                                                                       |                                           |                           | TNS : 50%      |           |
|                                                                                                       |                                           |                           | TNT : 67%      |           |

## References

1. Sun, Q.; Ye, W.; Wei, J.; Li, L.; Wang, J.; He, J.-H.; Lu, J.-M. Lead-free perovskite Cs<sub>3</sub>Bi<sub>2</sub>Br<sub>9</sub> heterojunctions for highly efficient and selective photocatalysis under mild conditions. *Journal of Alloys and Compounds* **2022**, *893*, 162326, doi:https://doi.org/10.1016/j.jallcom.2021.162326.
2. Schünemann, S.; van Gastel, M.; Tüysüz, H. A CsPbBr<sub>3</sub>/TiO<sub>2</sub> Composite for Visible-Light-Driven Photocatalytic Benzyl Alcohol Oxidation. *ChemSusChem* **2018**, *11*, 2057–2061, doi:https://doi.org/10.1002/cssc.201800679.
3. Jin, J.; Huang, H.; Chen, C.; Smith, P.W.; Folgueras, M.C.; Yu, S.; Zhang, Y.; Chen, P.-C.; Seeler, F.; Schaefer, B.; et al. Benzyl Alcohol Photo-oxidation Based on Molecular Electronic Transitions in Metal Halide Perovskites. *ACS Photonics* **2023**, *10*, 772–779, doi:https://doi.org/10.1021/acsp Photonics.3c00042.

4. Bao, X.; Li, H.; Wang, Z.; Tong, F.; Liu, M.; Zheng, Z.; Wang, P.; Cheng, H.; Liu, Y.; Dai, Y.; et al. TiO<sub>2</sub>/Ti<sub>3</sub>C<sub>2</sub> as an efficient photocatalyst for selective oxidation of benzyl alcohol to benzaldehyde. *Applied Catalysis B: Environmental* **2021**, *286*, 119885, doi:<https://doi.org/10.1016/j.apcatb.2021.119885>.
5. Du, M.; Zeng, G.; Huang, J.; Sun, D.; Li, Q.; Wang, G.; Li, X. Green Photocatalytic Oxidation of Benzyl Alcohol over Noble-Metal-Modified H<sub>2</sub>Ti<sub>3</sub>O<sub>7</sub> Nanowires. *ACS Sustainable Chemistry & Engineering* **2019**, *7*, 9717-9726, doi:<https://doi.org/10.1021/acssuschemeng.9b01817>.
6. Zhang, X.-F.; Wang, Z.; Zhong, Y.; Qiu, J.; Zhang, X.; Gao, Y.; Gu, X.; Yao, J. TiO<sub>2</sub> nanorods loaded with AuPt alloy nanoparticles for the photocatalytic oxidation of benzyl alcohol. *Journal of Physics and Chemistry of Solids* **2019**, *126*, 27-32, doi:<https://doi.org/10.1016/j.jpcs.2018.10.026>.
7. JamJam, N.M.; Taufiq Yap, Y.H.; Muhamad, E.N.; Izham Saiman, M.; Saleh, T.A. Free solvent oxidation of molecular benzyl alcohol by newly synthesized AuPd/titania catalysts. *Inorganic Chemistry Communications* **2019**, *107*, 107471, doi:<https://doi.org/10.1016/j.inoche.2019.107471>.
8. Bresolin, B.-M.; Günnemann, C.; Bahnmann, D.W.; Sillanpää, M. Pb-Free Cs<sub>3</sub>Bi<sub>2</sub>I<sub>9</sub> Perovskite as a Visible-Light-Active Photocatalyst for Organic Pollutant Degradation. *Nanomaterials* **2020**, *10*, 763, doi:<https://doi.org/10.3390/nano10040763>.
9. Masri, M.; Girisha, K.B.; Hezam, A.; Qahtan, T.F.; Alkanad, K.; Masri, F.; Namratha, K.; Udayabhanu; Byrappa, K. Enhanced photocatalytic activity and stability of 2D Cs<sub>3</sub>Bi<sub>2</sub>Br<sub>9</sub> perovskite nanosheets synthesized via modified antisolvent method. *Colloids and Surfaces C: Environmental Aspects* **2024**, *2*, doi:<https://doi.org/10.1016/j.colsuc.2023.100024>.
10. Xu, W.-L.; Hu, J.; Yang, Q.; Lian, Y.; Zheng, M.; Du, E. Charge transfer dynamics in C<sub>3</sub>N<sub>4</sub> encapsulated Cs<sub>3</sub>Bi<sub>2</sub>Br<sub>9</sub> nanocrystals heterojunction for photocatalytic application. *Journal of Alloys and Compounds* **2024**, *988*, doi:<https://doi.org/10.1016/j.jallcom.2024.174275>.
11. Hua, S.; Yu, X.; Li, F.; Duan, J.; Ji, H.; Liu, W. Hydrogen titanate nanosheets with both adsorptive and photocatalytic properties used for organic dyes removal. *Colloids and Surfaces A: Physicochemical and Engineering Aspects* **2017**, *516*, 211-218, doi:<https://doi.org/10.1016/j.colsurfa.2016.12.031>.
12. Deng, Q.; Huang, C.; Xie, W.; Zhang, J.; Zhao, Y.; Hong, Z.; Pang, A.; Wei, M. Significant reduction of harmful compounds in tobacco smoke by the use of titanate nanosheets and nanotubes. *Chemical Communications* **2011**, *47*, 6153-6155, doi:<https://doi.org/10.1039/c1cc10794a>.
